# Supplementary material
Source: PubMed Central journal article supplement (PMC5161596)
Supplement: NIHMS822004-supplement-supp_guide.pdf [file NIHMS822004-supplement-supp_guide.pdf]

**Supplementary video 1. Synchronous somatic calcium transients in *Drosophila* astrocytes.**

Top left: mCherry. Top right: GCaMP6s. Bottom left: merge. Video was sped up X100.

**Supplementary video 2. Concomitant activity of Tdc2<sup>+</sup> neurons and astrocytes.**

Top left: GCaMP6s labeled astrocytes. Top right: R-GECO1 labeled Tdc2<sup>+</sup> neurites.

Bottom left: merge. Video was sped up X50.
